# Supplementary material
Source: HighWire-hosted journal article supplement (https://ard.bmj.com/content/82/6/742)
Supplement: inline-supplementary-material-1 [file inline-supplementary-material-1.pdf]

## **Supplementary material 1**

### **Research Questions used in the systemic literature review informing this set of recommendations**

*Research question 1:* Which opportunistic and chronic infections in people with AIIRD can and should we screen for?

*Research question 2:* What screening and prophylaxis can we use and does it work? The following PICO structure was agreed: P - People with AIIRD, I – Immunosuppression/immunomodulation (including steroids), C - People with AIIRD not on immunosuppression, O1 - screening and prophylaxis, O2 - effectiveness of screening and prophylaxis.

### **Pathogens that were included in the systemic literature review informing this set of recommendations**

Mycobacterium tuberculosis complex

Non-tuberculous mycobacteria

Hepatitis B virus

Hepatitis C virus

Hepatitis D virus

Hepatitis E virus

Human immunodeficiency virus

Varicella zoster virus

Herpes simplex virus

Human Herpes Virus 8

*Pneumocystis jirovecii*

Human papilloma virus

*Leishmania* spp.

*Strongyloides stercoralis*

Histoplasma

*Toxoplasma gondii*

*Trypanosoma cruzi*

Cytomegalovirus

Epstein-Barr virus

West Nile virus

*Cryptosporidium*

*Actinomyces* spp.

*Bartonella* spp.

*Campylobacter* spp.

*Legionella* spp.

*Leptospira* spp.

*Listeria* spp.

*Salmonella* spp.

*Shigella* spp.

*Treponema pallidum*

*Nocardia* spp.

*Aspergillus* spp.

*Coccidioides* spp.

*Candida* spp.

JC virus

*Isospora* spp.

*Wuchereria bancrofti*

*Loa loa*

*Onchocerca* spp.

*Enterobius vermicularis*

*Ascaris* spp.

*Schistosoma* spp.

*Fasciola* spp.

*Paragonimus* spp.

*Taenia* spp.

*Echinococcus* spp.

*Entamoeba* spp.

*Gardia lamblia*

*Cryptosporidium* spp.

*Toxocara* spp.

*Trichinella spiralis*

*Chlamydia* spp.

*Cryptococcus* spp.

*Neisseria* spp.

*Hemophilus influenzae*

Human T-lymphotropic virus

*Influenza viruses*

Mucormycetes

*Paracoccidioides* spp.

Parvovirus B19

*Streptococcus pneumoniae*

*Talaromyces* spp.

*Cyclospora cayetanensis*

*Ancylostoma* spp.

*Trichuris* spp.
